# Supplementary material for: Simple and label-free fluorescence detection of ascorbic acid in rat brain microdialysates in the presence of catecholamines
Source: Royal Society of Chemistry journal article supplement (doi:10.1039/c7nj04574c), 2018-01-01
Supplement: c7nj04574c1.pdf [file c7nj04574c1.pdf]

New Journal of Chemistry

Electronic Supporting Information

A simple and label-free fluorescence detection of ascorbic acid in rat  
brain microdialysates in the presence of catecholamines

Shuyun Zhu <sup>a,b\*†</sup>, Cuihua Lei <sup>a†</sup>, Yue Gao <sup>a</sup>, Jing Sun <sup>b</sup>, Hongwei Peng <sup>c</sup>, Han Gao <sup>a</sup>,  
Ruixue Zhang <sup>a</sup>, Rui Wang <sup>a</sup>, Xian-En Zhao <sup>a,b\*</sup>, Hua Wang <sup>a\*</sup>

<sup>a</sup> Institute of Medicine and Materials Applied Technologies, College of Chemistry and Chemical Engineering, Qufu Normal University, Qufu City, Shandong Province, 273165, China. E-mail: shuyunzhu1981@163.com (S. Zhu); xianenzhao@163.com (X. Zhao); huawangqfnu@126.com (H. Wang).

† The authors contributed equally to this work.

<sup>b</sup> Qinghai Key Laboratory of Qinghai-Tibet Plateau Biological Resources, Northwest Institute of Plateau Biology, Chinese Academy of Sciences, Xining City, Qinghai Province, 810001, Qinghai, China.

<sup>c</sup> Hospital of University, Qufu Normal University, Qufu City, Shandong 273165, China.

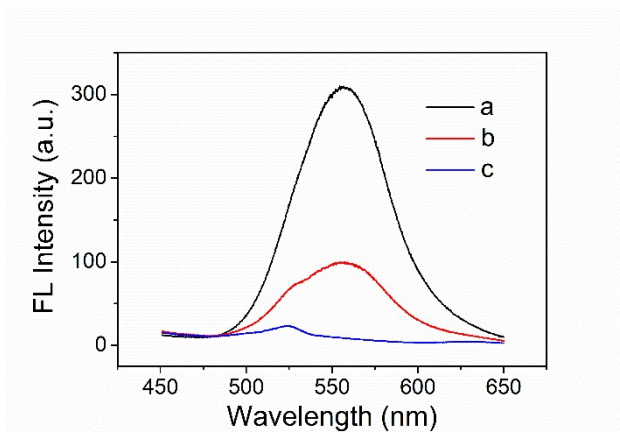

**Fig. S1** The fluorescence spectra of  $\text{Ag}^+$  and OPD (a),  $\text{Ag}^+$  + OPD + AA (b), and  $\text{Ag}^+$

+ AA + OPD (c.) The final concentrations of OPD,  $\text{Ag}^+$ , and AA are  $180 \mu\text{M}$ ,  $96 \mu\text{M}$ , and  $40 \mu\text{M}$ , respectively.

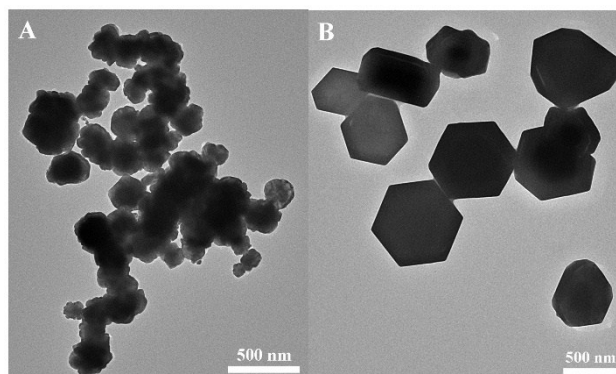

**Fig. S2** TEM images of silver nanoparticles formed during the reaction process of  $\text{Ag}^+$  and OPD (A) and  $\text{Ag}^+$  and AA (B).

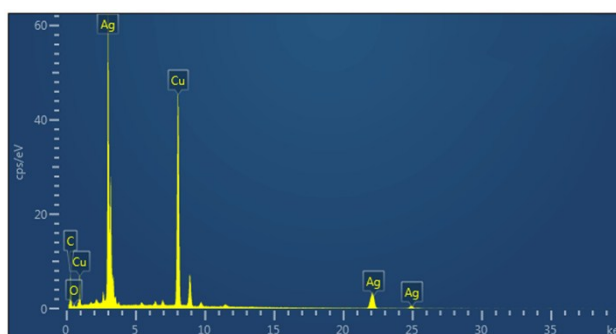

**Fig. S3** The EDS pattern of silver nanoparticles formed during the reaction process of  $\text{Ag}^+$  and OPD.

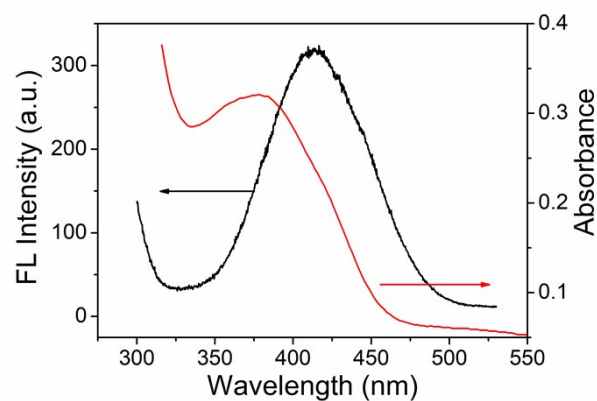

**Fig. S4** Spectral overlap: absorption spectrum (red) and excitation spectrum of  $\text{Ag}^+$ -

OPD system (black).

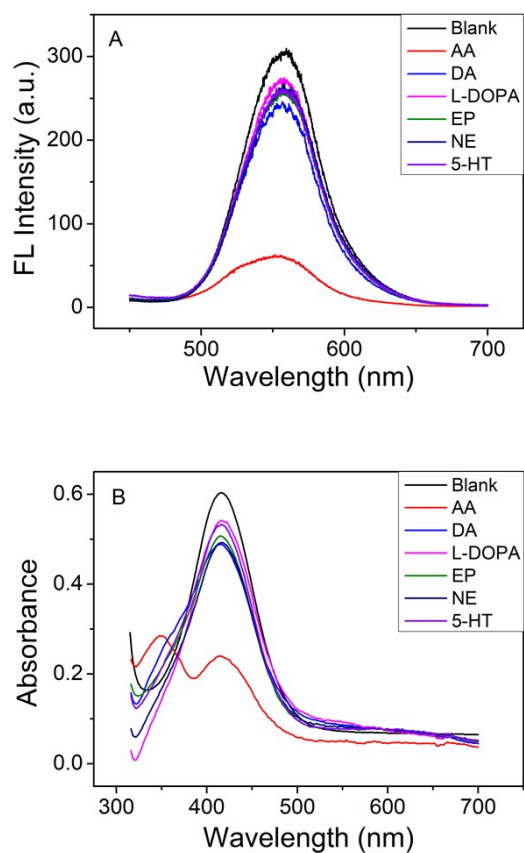

**Fig. S5** The fluorescence emission (A) and absorbance spectra (B) of Ag<sup>+</sup>-OPD in the absence and presence of catecholamines and AA, where the concentrations of catecholamines and AA are 30  $\mu$ M.
